# Supplementary material
Source: Research Square preprint supplement (doi:10.21203/rs.3.rs-9236702/v1)
Supplement: Supplementary file 1 [file f4901bcfe12042606e8198c0.docx]

***Case-Control sub-study***

*Bleeding cohort and control group characteristics*

Table 1 demonstrates the characteristics of both groups, including epidemiological data, baseline medications, variceal status and laboratory parameters at baseline EVL. Patients in the bleeding cohort tended to be younger (56.5 vs. 61 years; p = 0.07). Moreover, we observed a higher intake of anticoagulants (20.3% vs. 5.4%; p = 0.005) and a longer aPTT (43.7 secs. vs. 40.2 secs.; p = 0.022) in the bleeding group in comparison to the control group. Patients with EVL-induced ulcer bleeding tended to have a higher rate of ascites at baseline EVL (p = 0.07).

*Risk factors for EVL-induced bleeding*

Due to the difference in odds between indications for EVL, we performed a subgroup analysis based on the EVL indication to remove this as a confounding factor. Due to the small number of EVL-induced ulcer bleeds after elective EVL, we analyzed only the semi-elective and emergency EVL groups (see Table 2).

In the subgroup of emergency EVL, patients with ascites were four times more likely to develop ulcer bleeding (OR: 4.12, 95 CI 1.08-15.67). The presence of ascites indicates a higher portal pressure and a higher risk of variceal bleeding and probably EVL-induced bleeding. Interestingly, we did not observe this result in the semi-elective group. This contradictory result implies that it may be cohort-dependent. Therefore, more data are needed.  The CLIF-C scores and FIB4 score could not predict the occurrence of EVL-induced ulcer in the emergent setting bleeding. The subgroup of semi-elective EVLs was described in the main article.

| Parameters | Cohort | | | Control group | | | | P -value | |
| --- | --- | --- | --- | --- | --- | --- | --- | --- | --- |
|  | **N = 60** | | | **N = 111** | | | |  | |
| Age (median, IQR) | 56.5 | 46-68 | | 61 | 51-68 | | | | 0.07 |
| Males (n, %) | 47 | 78.3 | | 74 | 66.7 | | | | 0.13 |
| Cause of portal hypertension | **N** | **%** | | **N** | **%** | | |  | |
| PVT | 5 | 8.3 | | 5 | 4.5 | | | 0.89 | |
| Hepatic causes | 53 | 85.0 | | 104 | 93.7 | | | 0.21 | |
| - ALD | 30 | 50.0 | | 56 | 50.5 | | | 0.87 | |
| - Viral hepatitis | 14 | 23.3 | | 28 | 25.2 | | | 0.83 | |
| - MASLD | 7 | 11.7 | | 14 | 12.6 | | | 0.76 | |
| - Others | 15 | 25.0 | | 25 | 22.5 | | |  | |
| Hepatic cause with PVT | 2 | 3.3 | | 9 | 8.1 | | | 0.33 | |
| Combination of hepatic causes | 11 | 18.3 | | 14 | 12.6 | | | 0.53 | |
| Post-hepatic causes | 2 | 3.3 | | 2 | 1.8 | | | 0.61 | |
| Clinical state at Baseline | | | | | | | | | |
| HCC | 14 | 23.3 | | 38 | 34.2 | | | 0.78 | |
| TIPS | 3 | 5.0 | | 6 | 5.4 | | | 0.93 | |
| Dialysis | 2 | 3.3 | | 8 | 7.2 | | | 0.49 | |
| Kidney dysfunction | 2 | 3.3 | | 0 | 0.0 | | | 0.89 | |
| ACLF | | | | | | | 0.60 | | |
| - No ACLF | 43 | 71.7 | | 85 | 76.6 | | |  | |
| - ACLF 1 | 9 | 15.0 | | 16 | 14.4 | | |  | |
| - ACLF 2 | 5 | 8.3 | | 6 | 5.4 | | |  | |
| - ACLF 3 | 3 | 5.0 | | 6 | 5.4 | | |  | |
| Hepatic encephalopathy |  |  | |  |  | | | 0.16 | |
| - None | 41 | 68.3 | | 77 | 69.4 | | |  | |
| - Mild - moderate | 17 | 28.3 | | 26 | 23.4 | | |  | |
| - Severe | 2 | 3.3 | | 4 | 3.6 | | |  | |
| Ascites |  | | |  | | | | *0.07* | |
| - None | 7 | 11.7 | | 25 | 22.5 | | |  | |
| - Mild - moderate | 19 | 31.7 | | 34 | 30.6 | | |  | |
| - Severe | 34 | 56.7 | | 50 | 44.5 | | |  | |
| Medications at baseline EVL | | | | | | | | | |
| Non-selective b-blockers | 26 | 43.3 | | 43 | 38.7 | | | 0.94 | |
| Proton pump inhibitors | 39 | 65.0 | | 70 | 63.1 | | | 0.73 | |
| Anticoagulants | 12 | 20.3 | | 7 | 5.4 | | | 0.005* | |
| Antiplatelets | 9 | 15.3 | | 11 | 10.0 | | | 0.29 | |
| Lactulose | 20 | 33.9 | | 40 | 36.0 | | | 0.73 | |
| Ornithin-Aspartate | 15 | 25.4 | | 27 | 24.3 | | | 0.95 | |
| Rifaximine | 10 | 16.9 | | 16 | 14.4 | | | 0.76 | |
| Diuretics | 42 | 71.2 | | 75 | 67.6 | | | 0.66 | |
| Endoscopy at baseline EVL | | | | | | | | | |
| I+II Grade varices | 34 | 56.7 | | 75 | 67.6 | | | 0.13 | |
| Red spots on varices | 38 | 63.3 | | 78 | 70.2 | | | 0.45 | |
| Presence of fundic varices | 8 | 13.3 | | 10 | 9.0 | | | 0.36 | |
| No. of ligations (median, IQR) | 5 | | 4-6 | 5 | | 4-6 | | 0.22 | |
| Laboratory values at baseline | **Median** | **IQR** | | **Median** | **IQR** | | | **P-value** | |
| Bilirubin [mg/dl] | 2.8 | 1.3-6.1 | | 1.75 | 0.9-5.1 | | | 0.10 | |
| Creatinine [mg/dl] | 1.1 | 0.82-1.61 | | 0.99 | 0.75-1.36 | | | 0.11 | |
| MELD score | 17.5 | 13-22 | | 15 | 11-21 | | | 0.20 | |
| Platelets [/nl] | 108.5 | 67.3-175.8 | | 108 | 68-153.5 | | | 0.63 | |
| ALT [U/l] | 36 | 24-62.5 | | 37 | 22-56 | | | 0.47 | |
| AST [U/l] | 63 | 50-93 | | 57 | 35.5-89.5 | | | 0.09 | |
| FIB4-score | 6.18 | 3.50-9.25 | | 5.1 | 3.75-9.3 | | | 0.54 | |
| Hb [g/dl] | 9.3 | 8.1-10.8 | | 9.8 | 8.3-11.75 | | | 0.20 | |
| INR | 1.44 | 1.24-1.71 | | 1.34 | 1.18-1.66 | | | 0.17 | |
| aPTT [sec] | 43.7 | 36.9-50.0 | | 40.2 | 34.5-46.6 | | | 0.022* | |
| Leucocytes [/nl]† | 6.6 | 4.32-10.8 | | 6.55 | 4.48-9.5 | | | 0.72 | |
| CLIF-C AD score† | 55 | 48-62 | | 53 | 48-59 | | | 0.34 | |
| CLIF-C OF score‡ | 9 | 8-13 | | 9 | 8-11 | | | 0.91 | |
| CLIF-C ACLF score‡ | 56 | 47-61 | | 50 | 43-58 | | | 0.60 | |

**Table 1**. Patient characteristics at baseline EVL in the bleeding cohort and control group. Continuous data are shown as median and interquartile range, while categorical data are shown as absolute and relative frequencies. † CLIF-AD Score and leucocytes were not documented in cases of elective EVL. ‡ CLIF-OF and CLIF ACLF were documented only in cases of ACLF. Missing data: 1.8% for hepatic encephalopathy and ascites in the control group as well as 1.7% and 0.9% for medications at baseline in the bleeding cohort and control group respectively. ALD: Alcohol-associated liver disease, MASLD: Metabolic dysfunction-associated steatotic liver disease, PVT: portal vein thrombosis, aPTT: activated partial thromboplastin time, FIB4: fibrosis 4 score.

| Parameter | Semi elective EVL | | | | | Emergency EVL | | | | |
| --- | --- | --- | --- | --- | --- | --- | --- | --- | --- | --- |
|  | **Cases** | | **Controls** | | **P** | **Cases** | | **Controls** | | **P** |
|  | **N = 28** | | **N = 52** | |  | **N = 27** | | **N = 50** | |  |
| Age | 57.5 | 51-68 | 61.5 56-67 | | 0.20 | 54 44-68 | | 59.5 48-71 | | 0.42 |
|  | N | % | N | % |  | N | % | N | % |  |
| Males | 22 | 78 | 32 | 61.5 | 0.12 | 20 | 74.5 | 35 | 70.0 | 0.70 |
| Clinical Characteristics | | | | | | | | | | |
| Anticoagulants | 5 | 17.9 | 3 | 5.8 | 0.12 | 5 | 18.5 | 4 | 8.0 | 0.26 |
| B-blockers | 12 | 42.9 | 30 | 57.7 | 0.21 | 16 | 59,3 | 24 | 48,0 | 0.29 |
| Non-sel. b-blockers | 10 | 35.7 | 25 | 48.1 | 0.29 | 15 | 55,6 | 22 | 44.0 | 0.33 |
| HCC | 10 | 35.7 | 16 | 30.8 | 0.65 | 11 | 40.7 | 19 | 38.0 | 0.81 |
| TIPS | 2 | 7.1 | 5 | 9.6 | 0.71 | 0 | 0.0 | 1 | 2.0 | 1.00 |
| Dialysis | 1 | 3.6 | 1 | 1.9 | - | 1 | 3.7 | 7 | 14.0 | 0.25 |
| ACLF |  |  |  |  | 0.24 |  |  |  |  | 0.69 |
| - No ACLF | 20 | 71.4 | 43 | 82.7 |  | 18 | 66.7 | 31 | 62.0 |  |
| - ACLF 1 | 6 | 21.4 | 9 | 17.3 |  | 3 | 11.1 | 7 | 14.0 |  |
| - ACLF 2 | 1 | 3.6 | - | - |  | 4 | 14.8 | 6 | 12.0 |  |
| - ACLF 3 | 1 | 3.6 | - | - |  | 2 | 7.4 | 6 | 12.0 |  |
| Kidney dysfunction | 2 | 7.1 | 0 | 0.0 |  | 0 | 0.0 | 0 | 0.0 |  |
| Hepatic encephalopathy 0.56 0.44 | | | | | | | | | | |
| - None | 19 | 67.9 | 37 | 71.2 |  | 17 | 63.0 | 35 | 70.0 |  |
| - Mild-moderate | 9 | 32.1 | 15 | 28.8 |  | 9 | 33.3 | 11 | 22.0 |  |
| - Severe | 1 | 3.6 | - | - |  | 1 | 3.7 | 4 | 8.0 |  |
| Ascites 0.48 0.03* | | | | | | | | | | |
| - None | 2 | 7.1 | 5 | 9.6 |  | 3 | 11.1 | 18 | 36.0 |  |
| - Mild-moderate | 6 | 21.4 | 15 | 28.8 |  | 13 | 48.1 | 14 | 28.0 |  |
| - Severe | 20 | 71.4 | 32 | 61.5 |  | 11 | 40.7 | 18 | 36.0 |  |
| ICU at Baseline | 4 | 14.3 | 0 | 0.0 | 0.01* | 12 | 44.4 | 28 | 56.0 | 0.33 |
| Lab. values | **Median** | **IQR** | **Median** | **IQR** |  | **Median** | **IQR** | **Median** | **IQR** |  |
| MELD | 19.5 | 14-23 | 16 | 12-20 | *0.09* | 17 | 13-22 | 16.5 | 11-24 | 0.68 |
| Platelets [/nl] | 103 | 72-169 | 111 | 72-154 | 0.97 | 113 | 64-176 | 110.5 | 54-175 | 0.59 |
| INR | 1.42 | 1.25-1.65 | 1.32 | 1.22-1.60 | 0.22 | 1.5 | 1.29-1.75 | 1.44 | 1.15-1.89 | 0.53 |
| Hb [g/dl] | 10.2 | 8.9-10.9 | 10.7 | 8.8-12.2 | 016 | 8.3 | 7.7-9.7 | 8.6 | 6.9-10.1 | 0.46 |
| aPTT [sec] | 43.7 | 40.7-49.8 | 42.3 | 35.4-46.8 | *0.07* | 43.9 | 34.9-58.8 | 39.7 | 33.1-48.2 | 0.24 |
| CLIF-C AD | 55 | 48-61 | 52 | 44-58 | 0.22 | 55 | 49-68 | 55.5 | 48-63 | 0.63 |
| CLIF-C OF | 8.5 | 7-9.5 | 8 | 8-9 | 0.68 | 12 | 10-14 | 11 | 9-14 | 0.75 |
| CLIF-C ACLF | 46.5 | 43-51 | 44 | 42-49 | 0.50 | 60 | 53-62 | 52 | 48-61 | 0.34 |

**Table 2.** Patient characteristics at baseline EVL in the cohort and control group based on EVL indication. Continuous data are shown as median and interquartile range, while categorical data as absolute and relative frequencies. For brevity purposes, we omitted the following non-statistical significant differences we observed: Medication at baseline (proton pump inhibitors, antiplatelets, rifaximine, lactulose, ornithine-aspartate, and diuretics), lab values at baseline (total bilirubin, sodium, creatinine, AST, ALT, leucocytes), cause of portal hypertension. aPTT: activated partial thromboplastin time.

| **Cause of death** | **N** | **%** |
| --- | --- | --- |
| Cardiogenic shock | 1 | 4 |
| Brain Hemorrhage | 2 | 8 |
| ACLF | 13 | 52 |
| Septic shock | 7 | 28 |
| Bleeding from another source | 1 | 4 |
| Combination hypovolemic/septic shock | 1 | 4 |

**Table 3**. Cause of 6-week mortality. ACLF: acute on chronic liver failure
